# Supplementary material
Source: publisher site journal article supplement (https://www.dovepress.com/article/556114)
Supplement: Supplementary file 1 [file 556114%20Supplementary%20Material.docx]

APPENDICES

Appendix 1:

Literature Search: Summary of Papers

| **Study** | **Population** | **Intervention**  **[Evaluation]** | **Comparison** | **Outcome** |
| --- | --- | --- | --- | --- |
| Mazotti *et al.* 2011 | Single-centre, US study. 45 supervisors of 3rd year students who supervised both longitudinal (one year) and regular block placements (of unspecified duration), multi-specialty, across two year group cohorts. | 29 Likert scale questions (5-point scale). Scale: 1-strongly disagree; 5-strongly agree | Responses merged into three overarching questions (*validity of evaluation process; Quality of clinical skills evaluation; Willingness to provide feedback)*, and results statistically compared between longitudinal and block rotations | Assessors perceived longitudinal placements were better for:  V*alidity of evaluation process*  Effect size = 0.63 (p<0.001)  *Quality of clinical skills evaluation*  Effect size = 1.11 (p<0.001)  *Willingness to provide feedback*  Effect size = 0.94 (p<0.001) |
| DaRosa *et al.* 2000 | Single-centre, US study. 31 supervisors of 3rd year students, 10-week surgical placement, across five year group cohorts. | 25 Likert scale questions (5-point scale). Scale: 1-strongly disagree; 5-strongly agree. | Mean responses calculated for each item, and presented as descriptive statistics. | Assessors held relatively positive perceptions about the quality and content of the evaluation system.  Assessors perceived they:  - rated fairly (mean 3.9/5.0)  - observed adequate clinical skills (mean 4.0/5.0)  - provided remedial attention where needed (mean 3.9/5.0).  However, assessors perceived they struggled to rate poor levels of performance and may not have been rating consistently with other raters.  Assessors perceived they:  - did not water down negative evaluations (mean 2.7/5.0)  - candidly commented on poor performance (mean 2.3/5.0)  - used similar criteria to other raters (mean 2.8/5.0). |

PICO format used for comparison of studies (54).

Appendix 2:

Sign-off grading


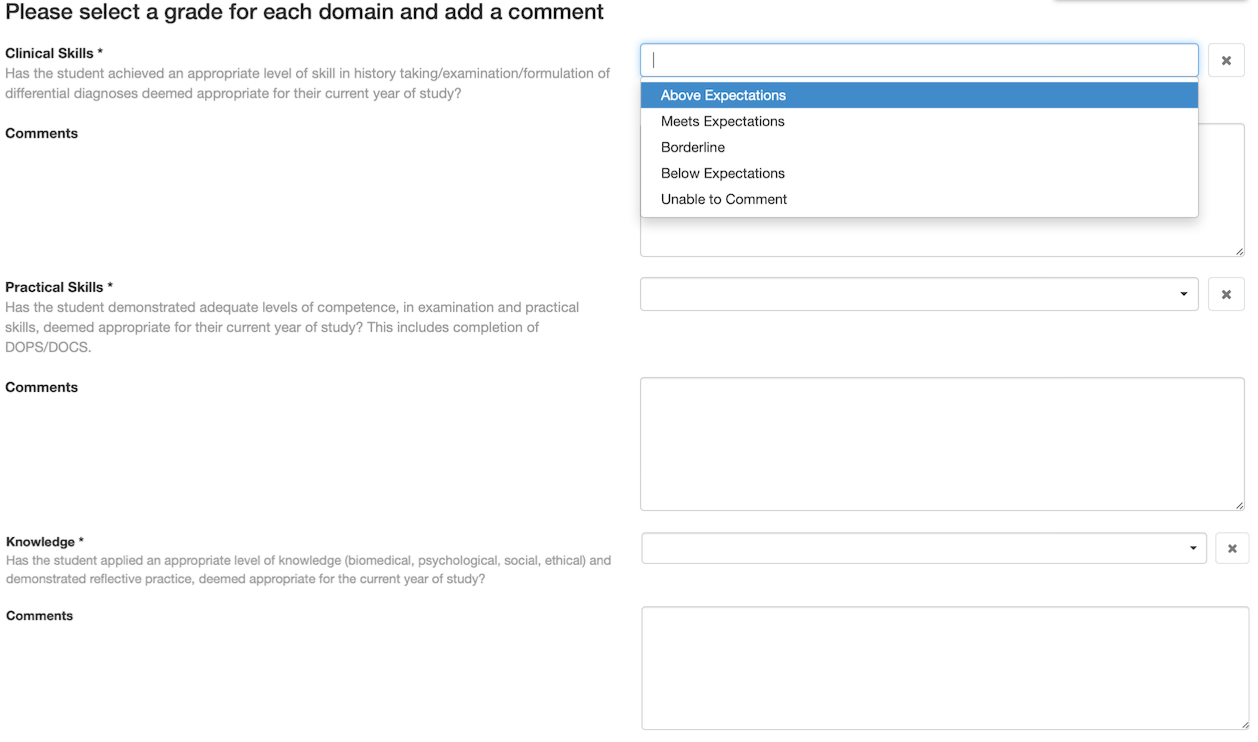


Appendix 3:

Supervisor feedback survey

The following questionnaire is intended to help us improve the sign-off process for medical students on clinical placements. 

Answers are anonymous and there is no time limit. There will be 10 questions and **it will take around 5-10 minutes of your time.**Your feedback is much appreciated. 

For questions 1-4 please indicate your response to each statement by selecting a tick-box.

For questions 6-10 please answer in the spaces provided.

Start of Block: Default Question Block

**Background**
Please indicate your specialty

- GP
- Medicine
- Surgery

Q1

I feel that I have adequate supervision time to assess students' knowledge on their clinical placement

|  | Strongly Disagree | Disagree | Somewhat Disagree | Neither Agree nor Disagree | Somewhat Agree | Agree | Strongly Agree |
| --- | --- | --- | --- | --- | --- | --- | --- |
|  |  |  |  |  |  |  |  |

Q2

I feel that I have adequate supervision time to assess students' skills on their clinical placement

|  | Strongly Disagree | Disagree | Somewhat Disagree | Neither Agree nor Disagree | Somewhat Agree | Agree | Strongly Agree |
| --- | --- | --- | --- | --- | --- | --- | --- |
|  |  |  |  |  |  |  |  |

Q3

I believe that my assessment of students' knowledge reflects their likely performance in end-of-year examinations

|  | Strongly Disagree | Disagree | Somewhat Disagree | Neither Agree nor Disagree | Somewhat Agree | Agree | Strongly Agree |
| --- | --- | --- | --- | --- | --- | --- | --- |
|  |  |  |  |  |  |  |  |

Q4

I believe that my assessment of students' skills reflects their likely performance in end-of-year examinations

|  | Strongly Disagree | Disagree | Somewhat Disagree | Neither Agree nor Disagree | Somewhat Agree | Agree | Strongly Agree |
| --- | --- | --- | --- | --- | --- | --- | --- |
|  |  |  |  |  |  |  |  |

Q5

Please indicate how many contact hours you have on average with students you supervise before you perform the end-of-placement sign-off


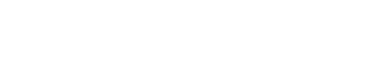


| Page Break |  |
| --- | --- |

Q6

Please list what sources of information you utilise when making a sign-off decision


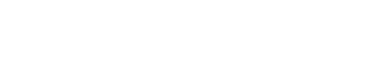


Q7

Please comment on what you feel are the main advantages of a single clinical supervisor sign-off model for students on clinical placement


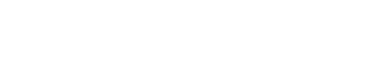


Q8

Please comment on what you feel are the main disadvantages of a single clinical supervisor sign-off model for students on clinical placement


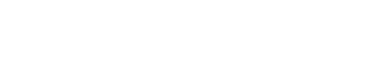


| Page Break |  |
| --- | --- |

Q9

Please describe how the current sign-off process could be improved


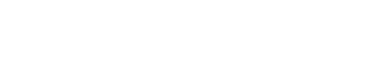


Q10a

Please indicate if you would make any changes to the end-of-placement sign-off process

- Yes
- No

Q10b

Please explain your answer to question 10a above


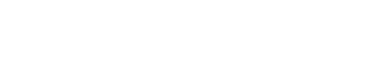


End of Block: Default Question Block

We thank you for your time spent taking this survey.

Your response has been recorded.

Appendix 4:

Template Coding

| Assessment form issues |
| --- |
| Assessor training |
| Contact time |
| Conflicting learning requirements |
| Feasibility |
| Feedback |
| Informal sign-off considerations |
| Longitudinal assessment |
| Multi-source feedback |
| Other supervisory figures |
| Oversight of learner |
| Placement duration |
| Role of supervisor |
| Staff absences |
| Student curriculum |

Appendix 5:

NVIVO Thematic analysis:

| Themes | Sub-Themes | Codes |
| --- | --- | --- |
| POSITIVES OF SINGLE SUPERVISOR MODEL | | |
| Accountability | Robust competency rating | Accountability to one person allows oversight |
| Adequate scrutiny through named assessor |
| Assigned assessor rather than student selected assessor |
| Multiple assessors might presume another colleague has oversight |
| Institutional requirements | Expected standards should be known to assessor |
| Communication enhanced with a named contact for queries |
| Training in sign-off form and curriculum for assessor |
| Student attendance promoted at sessions with named assessor |
| Continuity | Continuity of assessment | Direct contact with student enhanced |
| Identification of gaps in student knowledge |
| Longitudinal assessment provides a better view of the learner |
| Continuity of learning | Assessor can guide learning needs |
| Heightened awareness of student strengths/weaknesses |
| Individualised feedback from known assessor |
| Feasibility | Feasibility for assessor | Logistical ease |
| No requirement to review information from multiple raters |
| Time efficient sign-off process |
| Simple sign-off process for assessor (one meeting, one form) |
| Feasibility for student | Achievable sign-off process for student (one meeting, one form) |
| One sign-off minimalises potential student stress |
| NEGATIVES OF SINGLE SUPERVISOR MODEL | | |
| Effect on learning | Group structure of student placement | One student in learning group may dominate |
| Groups of students on each placement reduces individual contact time |
| Negative effect on student learning from others in informal supervisory roles | Modern working practices share inpatient care between consultants |
| Reduced student motivation to engage with teachers who are not the named supervisor |
| Student expectation that clinical time without their supervisor present is not efficient to achieve goals |
| Sign-off focused students | Attendance of learners drops once sign-off form completed |
| Students are sign-off focused |
| Supervisor style variance | Conflict between role of teacher and assessor |
|  | Formal feedback limited to one voice |
|  | Supervision style may not suit student learning style |
| Inflexibility | Availability | Clashing university and hospital agendas/learning activities |
| In person sign-off causes timetabling difficulties |
| Lack of information available from others in supervisory roles at time of sign-off |
| No interim progress meeting |
| Staff leave or emergency cover |
| Staff or student sickness |
| Organisational constraints | Changes to curriculum or to assessment forms |
| Frequent supervisor changes |
| No time provision for supervision in supervisor’s job plans |
| Service provision commitments take precedent |
| Unpaid supervisor role |
| Limited contact time | Observation bias | Altered motivation of students in presence of assessor |
| Direct oversight of learner relatively brief |
| Limited feedback possibilities |
| Short rotations provide a snapshot viewpoint of competency |
| Student attendance needs to be adequate for accurate assessment |
| Variation in case presentation or informal teaching difficulty |
| Supervisor absence | Absence of supervisor affects entire process (leave/sickness) |
| Fragmented period of observation from named supervisor |
| Lack of backup option if the single supervisor is off |
| Supervisor’s rota may not align with the best educational opportunities for students |
| Psychometric concerns | Reliability concerns | Assessor bias |
| Differing assessor perceptions of acceptable standards |
| No triangulation with other assessors |
| Rating variation between different assessors |
| Snapshot assessments |
| Supervisors may not be equally engaged in the process |
| Variation in assessor marking stringency |
| Validity concerns | Lack of workplace-based assessment requirements |
| No formal quantitative progress assessment of knowledge or skills |
| Rating often based on surrogate markers (attendance/punctuality) |
| Reluctance to fail |
| Willingness to engage/enthusiasm easier to rate than knowledge/skills |
| Sign-off form shortcomings | Generic sign-off form | Attendance log on form would be useful |
| Lack of specific tasks to complete (e.g. workplace-based assessment) |
| Overlapping skills domains |
| Ratings based on overall impressions |
| Ratings from previous placements not visible to supervisors |
| Tick box approach |
| Lack of student input on form | Lack of student activity logbook on form |
| Self-reflection/self-rating not included on form |
| Not all domains assessed on the sign-off form are necessarily observed | Clinical skills performance is often not observed |
| Skills tutor a better placed rater for skills |
| Lack of multi-source feedback mechanism |
| Process issues | In person sign-off can reduce depth of feedback due to time pressure |
| Junior doctors spend more time with students than supervisor |
| No option for remote sign-off |
| Sign-off may reflect performance in the workplace, rather than in exams |
| Teaching fellow well placed to rate students but not included on form |
